# Supplementary material for: Inactivation of the NLRP3 inflammasome mediates exosome-based prevention of atrial fibrillation
Source: Theranostics. 2024 Jan 1;14(2):608–21. doi: 10.7150/thno.89520 (PMC10758048; doi:10.7150/thno.89520)
Supplement: Supplementary file 1 — Supplementary figures and table. [file thnov14p0608s1.pdf]

|                     | P wave<br>(ms) | Heart rate<br>(bpm) | PR<br>(ms) | QRS<br>(ms) | QTc<br>(ms) | AERP<br>(ms) | AVERP<br>(ms) | AF incidence<br>(%) |
|---------------------|----------------|---------------------|------------|-------------|-------------|--------------|---------------|---------------------|
| Sham<br>(n=14)      | 16±1           | 349±18              | 49±3       | 19±2        | 224±8       | 37±5         | 77±5          | 16%                 |
| Sham + EVs<br>(n=4) | 15±2           | 348±22              | 45±3       | 18±1        | 211±7       | 43±3         | 80±4          | 25%                 |
| P value             | 0.71           | 0.97                | 0.2        | 0.62        | 0.17        | 0.3          | 0.53          | 0.42                |

**Supplemental Table 1 – Electrocardiographic and electrophysiological effects of intramyocardial injection of extracellular vesicle (EV) into normal hearts compared to sham animals.** AERP, atrial effective refractory period; AF, atrial fibrillation; AVERP, atrioventricular effective refractory period. Data presented as mean ± standard error of the mean. Continuous variables were analyzed using students T-test while categorical variables were analyzed using Fisher's exact test.

Talc + 10<sup>9</sup> EVs

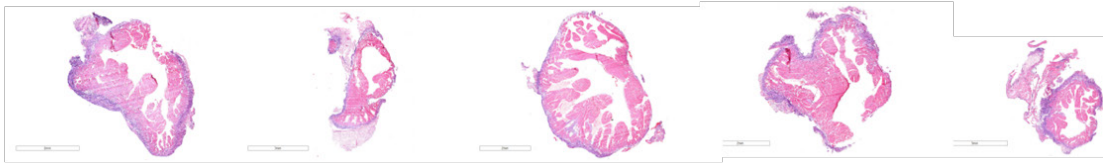

Talc + 10<sup>8</sup> EVs

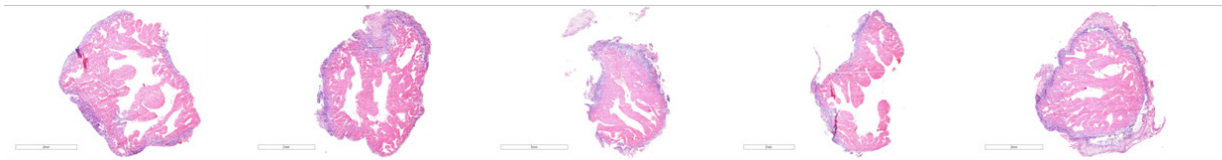

Talc + 10<sup>7</sup> EVs

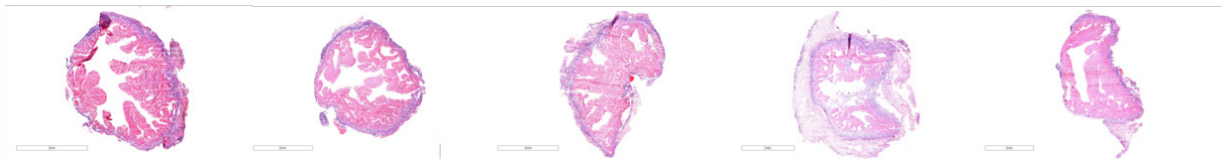

Talc + 10<sup>6</sup> EVs

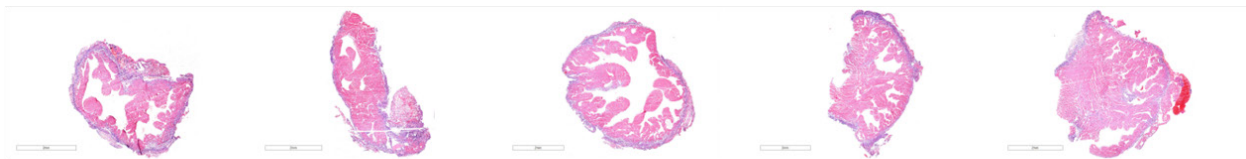

Talc + vehicle

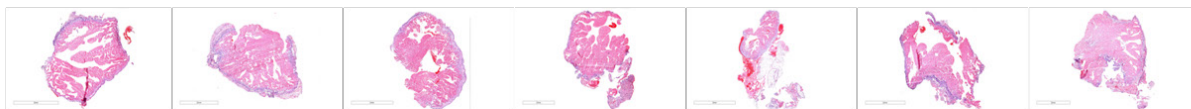

Sham

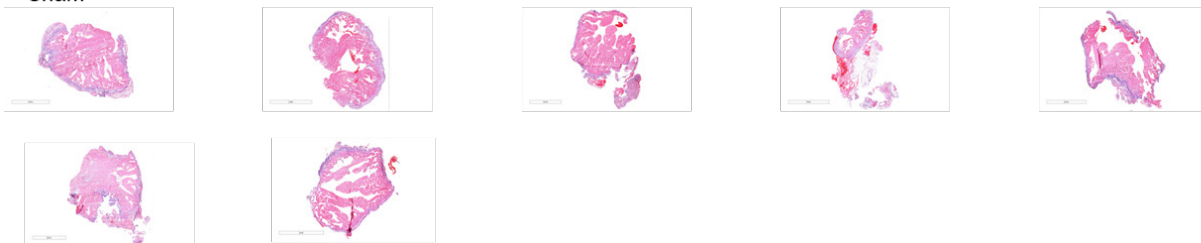

**Supplemental Figure 1 – Effect of extracellular vesicles (EVs) on atrial inflammatory infiltrates.** Hematoxylin and eosin images from each animal treated are shown demonstrating the effect of pericarditis and EVs on atrial inflammatory infiltrates. EV, extracellular vesicle. Scale bars 2mm.

Talc +  $10^9$  EVs

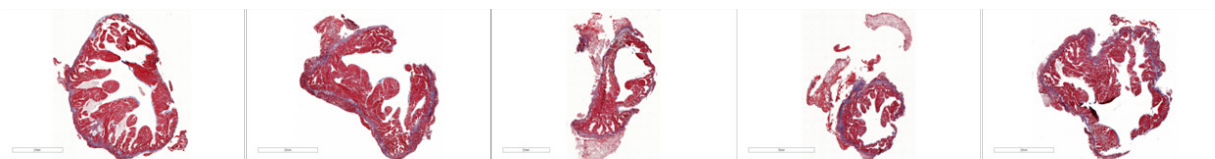

Talc +  $10^8$  EVs

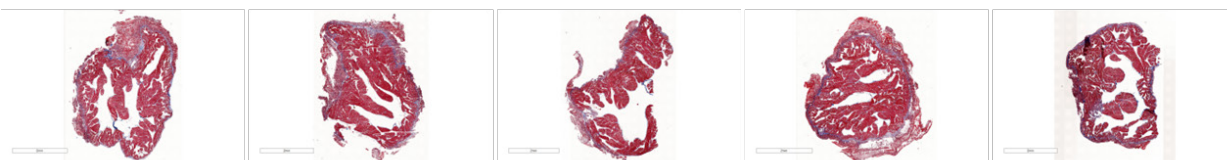

Talc +  $10^7$  EVs

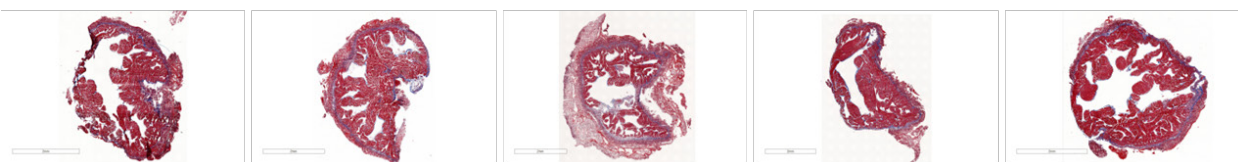

Talc +  $10^6$  EVs

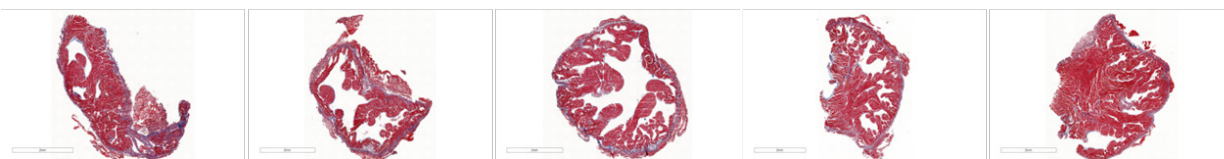

Talc + vehicle

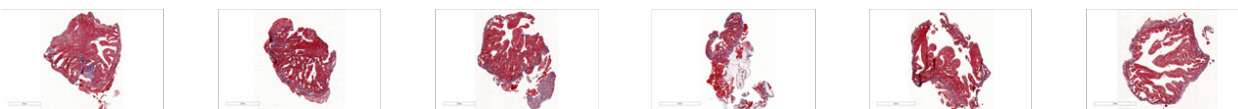

Sham

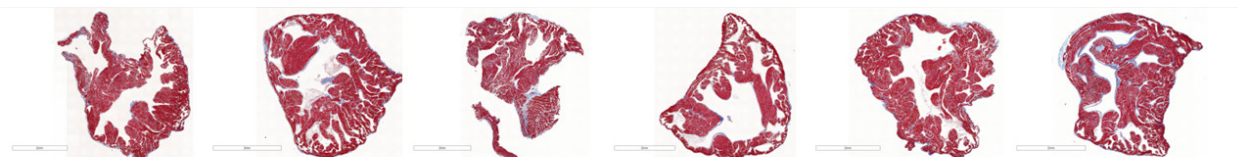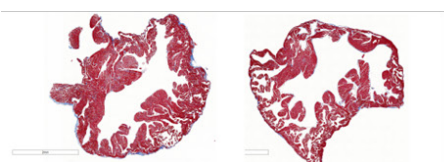

**Supplemental Figure 2 – Effect of extracellular vesicles (EVs) on atrial fibrosis.** Masson's Trichrome images from each animal treated are shown demonstrating the effect of pericarditis and EVs on atrial fibrosis. EV, extracellular vesicle. Scale bars 2mm.
